# Supplementary material
Source: Springer Nature journal article supplement (https://www.springermedizin.de/resource/supplementary/12865_2011_434_MOESM5_ESM.pdf/9427984)

**A***D-glucose (mmol/l)***5.5****50**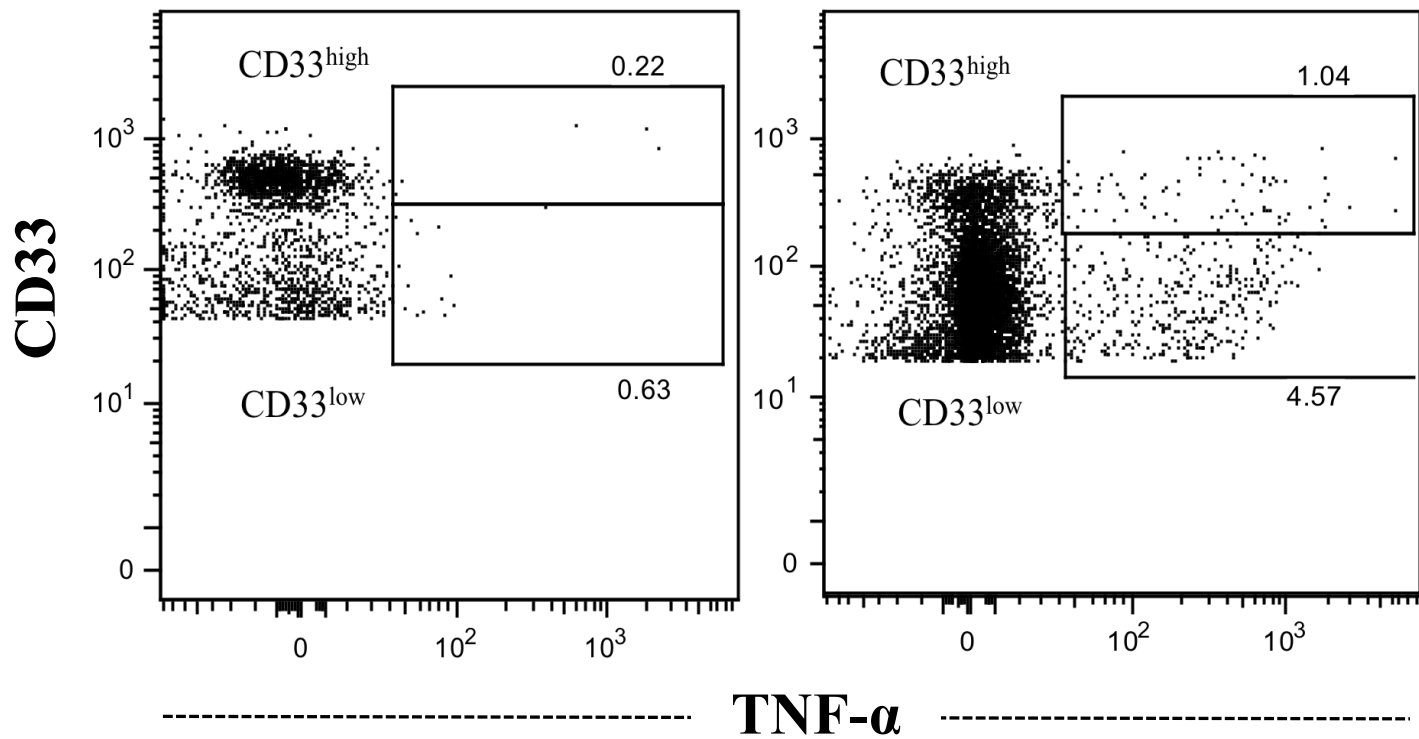**B**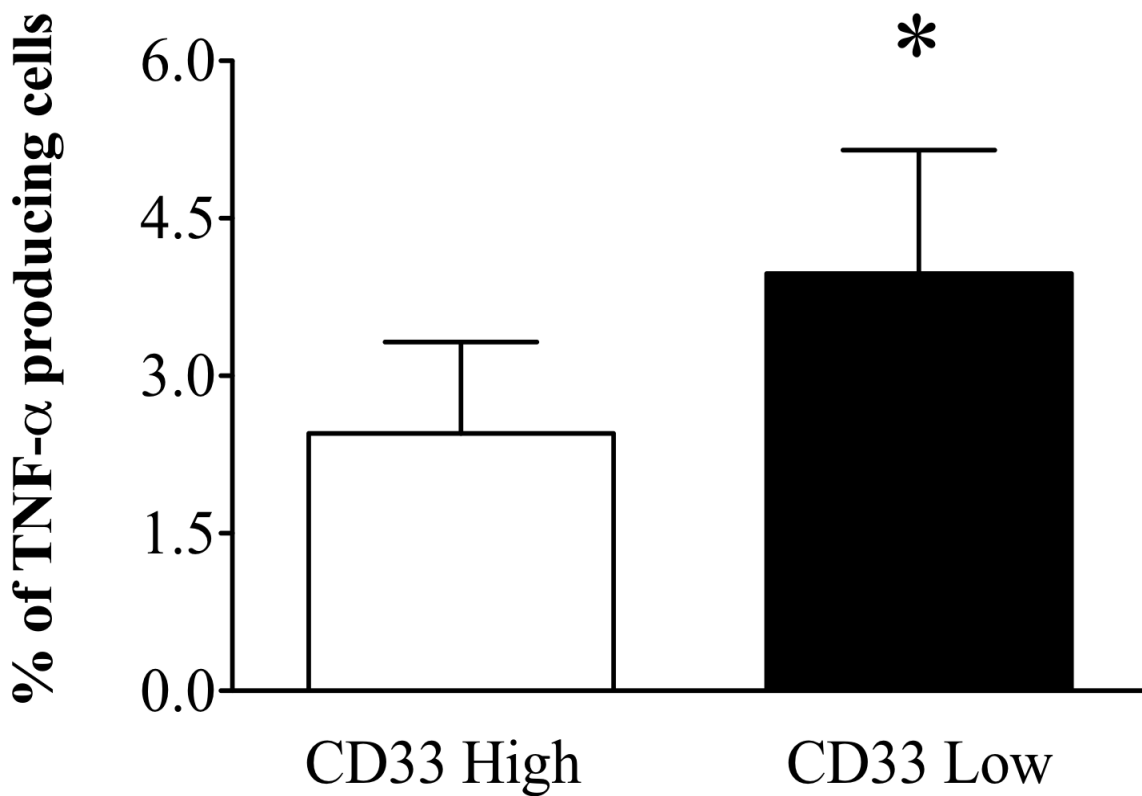

Supplement: MOESM5 [file 9427984]
